# Supplementary material for: High production of IL-12 by human dendritic cells stimulated with combinations of pattern-recognition receptor agonists
Source: PubMed Central journal article supplement (PMC11068792; doi:10.1038/s41541-024-00869-1), 2024-05-03
Supplement: 41541_2024_869_MOESM1_ESM.pdf [file 41541_2024_869_MOESM1_ESM.pdf]

*Supplementary Material*

**High production of IL-12 by human dendritic cells stimulated with combinations of pattern-recognition receptor agonists**

Brian C Gilmour, Alexandre Corthay, and Inger Øynebråten

**Table of contents**

*Supplementary Table 1.* Ligands used to stimulate pattern recognition receptors (PRRs), and ligand abbreviations ..... 2

*Supplementary Table 2.* Increased concentrations of the agonists of dectin-1, TLR2:1, or TLR2:6 did not trigger IL-12p70 production ..... 3

*Supplementary Table 3.* Increased concentrations of the ligands of dectin-1, TLR2:1, or TLR2:6 did not trigger IFN $\beta$  production ..... 3

*Supplementary Table 4.* Table 3 in colors: Data summary for the production of IL-12p70 and IFN $\beta$  by DCs stimulated with pattern-recognition receptor agonists..... 4

*Supplementary Table 5.* ELISA kits used for quantification of cytokines..... 5

*Supplementary Table 6.* Primary antibodies used for analysis of expression of cell surface molecules on monocytes and monocyte-derived DCs ..... 5

*Supplementary Table 7.* Isotype- and fluorophore-matched, irrelevantly targeted antibodies used as negative controls..... 5

*Supplementary Figure 1.* Gating and flow cytometry analysis of monocytes and monocyte-derived DCs..... 6

*Supplementary Figure 2.* The blood donors gave rise to monocyte-derived DCs with low CD14 expression ..... 7

*Supplementary Figure 3.* Levels of IL-12p70 induced by combinations containing the TLR4 ligand LPS-EK ..... 8

**Supplementary Table 1. Ligands used to stimulate pattern recognition receptors (PRRs), and ligand abbreviations**

| PRR ligand                                             | Abbreviation | Target receptor | Tested conc. (µg/mL) | Catno.       | Provider  |
|--------------------------------------------------------|--------------|-----------------|----------------------|--------------|-----------|
| 5'-triphosphate hairpin RNA <sup>‡</sup>               | 3p-hpRNA     | RIG-I           | 10                   | tlrl-hprna   | InvivoGen |
| Lipopolysaccharide from <i>E. coli</i> K12 (Ultrapure) | LPS          | TLR4            | 1                    | tlrl-pekllps | InvivoGen |
| Lipoteichoic acid from <i>Staphylococcus aureus</i>    | LTA          | TLR2:1, TLR2:6  | 0.1-100              | tlrl-pslta   | InvivoGen |
| <i>N</i> -Glycolyl-muramyl dipeptide                   | GMDP         | NOD2            | 0.1                  | tlrl-gmdp    | InvivoGen |
| ODN2395                                                | CpG          | TLR9            | 1                    | tlrl-2395    | InvivoGen |
| Pam3CSK4                                               | Pam3         | TLR2:1          | 0.1-10               | tlrl-pms     | InvivoGen |
| Poly(dA:dT) naked <sup>‡</sup>                         | p(dA:dT)     | cGAS/ALR        | 2                    | tlrl-patn    | InvivoGen |
| Poly(I:C) HMW*                                         | poly(I:C)    | TLR3            | 0.02; 20             | tlrl-pic     | InvivoGen |
| Poly(I:C) HMW <sup>‡*</sup>                            | poly(I:C)    | MDA5/TLR3       | 20                   | tlrl-pic     | InvivoGen |
| Resiquimod                                             | R848         | TLR7/8          | 0.5; 1               | tlrl-r848    | InvivoGen |
| Zymosan (depleted)                                     | Zym-D        | Dectin-1        | 1-20                 | tlrl-zyd     | InvivoGen |

<sup>‡</sup> 5'-triphosphate hairpin RNA, poly(dA:dT) naked, and poly(I:C) HMW were mixed with LyoVec™ to transfect the ligands into the cytosol.

\* HMW, high molecular weight

**Supplementary Table 2. Increased concentrations of the agonists of dectin-1, TLR2:1, or TLR2:6 did not trigger IL-12p70 production**

| Stimulated PRR        | Ligand     | Ligand concentration (µg/mL) | Absorbance |       | IL-12p70 (pg/mL) <sup>‡</sup> |
|-----------------------|------------|------------------------------|------------|-------|-------------------------------|
| <b>Unstimulated</b>   | None       | 0                            | 0.081      | 0.078 | ND                            |
| <b>Dectin-1</b>       | Zym-D      | 1                            | 0.083      | 0.081 | ND                            |
|                       |            | 10                           | 0.083      | 0.081 | ND                            |
|                       |            | 20                           | 0.080      | 0.083 | ND                            |
| <b>TLR2:1</b>         | Pam3CSK4   | 0.5                          | 0.088      | 0.082 | ND                            |
|                       |            | 1                            | 0.080      | 0.080 | ND                            |
|                       |            | 10                           | 0.083      | 0.078 | ND                            |
| <b>TLR2:1; TLR2:6</b> | LTA        | 0.5                          | 0.083      | 0.078 | ND                            |
|                       |            | 1                            | 0.079      | 0.079 | ND                            |
|                       |            | 10                           | 0.084      | 0.080 | ND                            |
|                       |            | 100                          | 0.082      | 0.081 | ND                            |
| <b>MDA5/TLR3</b>      | poly(I:C)* | 20                           | 1.353      | 1.455 | 1470.5                        |

ND, not detectable

<sup>‡</sup> Amounts of IL-12p70 (pg/mL) in supernatants from monocyte-derived DCs stimulated with the indicated ligand concentrations for 24 h.

\* Poly(I:C) was transfected into the cytosol by LyoVec<sup>™</sup>, a lipid-based transfection reagent. The ligand was included as positive control.

**Supplementary Table 3. Increased concentrations of the ligands of dectin-1, TLR2:1, or TLR2:6 did not trigger IFNβ production**

| Stimulated PRR        | Ligand      | Ligand concentration (µg/mL) | IFNβ (pg/mL) <sup>‡</sup> |       |
|-----------------------|-------------|------------------------------|---------------------------|-------|
| <b>Unstimulated</b>   | None        | 0                            | 7.1                       | 7.5   |
| <b>Dectin-1</b>       | Zym-D       | 1                            | 7.1                       | 7.4   |
|                       |             | 10                           | 6.9                       | 7.0   |
|                       |             | 20                           | 6.9                       | 6.7   |
| <b>TLR2:1</b>         | Pam3CSK4    | 0.5                          | 7.1                       | 7.6   |
|                       |             | 1                            | 6.9                       | 7.1   |
|                       |             | 10                           | 7.0                       | 7.2   |
| <b>TLR2:1, TLR2:6</b> | LTA         | 0.5                          | 7.1                       | 7.0   |
|                       |             | 1                            | 7.1                       | 7.1   |
|                       |             | 10                           | 7.1                       | 7.8   |
|                       |             | 100                          | 7.1                       | 7.2   |
| <b>MDA5/TLR3</b>      | poly(I:C) * | 20                           | 261.9                     | 289.2 |

<sup>‡</sup> Amounts of IFNβ (pg/mL) in supernatants from monocyte-derived DCs stimulated with the indicated ligand concentrations for 24 h.

\* Poly(I:C) was transfected into the cytosol by LyoVec<sup>™</sup>, a lipid-based transfection reagent. The ligand was included as positive control.

**Supplementary Table 4. Table 3 in colors:  
Data summary for the production of IL-12p70 and IFN $\beta$   
by DCs stimulated with pattern-recognition receptor agonists**

| Stimulated PRRs <sup>#</sup>               | Ligands                              | IL-12p70 <sup>⌘</sup> | IFN $\beta$ <sup>⌘</sup> |
|--------------------------------------------|--------------------------------------|-----------------------|--------------------------|
| <b>C1:</b> Dectin-1 + TLR7/8               | Zymosan-D + R848                     | +++++                 | -/+                      |
| <b>C2:</b> TLR2:1 + TLR3                   | Pam3CSK4 + poly(I:C)                 | +++++                 | +++                      |
| <b>C3:</b> TLR2:1 + MDA5/TLR3 <sup>§</sup> | Pam3CSK4 + poly(I:C) <sup>¶</sup>    | +++++                 | +++                      |
| <b>C4:</b> TLR3 + TLR7/8                   | poly(I:C) + R848                     | +++++                 | +++                      |
| <b>C5:</b> TLR3 + NOD2                     | poly(I:C) + <i>N</i> -GMDP           | +++++                 | +++                      |
| <b>C6:</b> TLR7/8 + MDA5/TLR3 <sup>§</sup> | R848 + poly(I:C) <sup>¶</sup>        | +++++                 | ++                       |
| TLR3 + TLR7/8                              | poly(I:C) [0.02] <sup>‡</sup> + R848 | ++++                  | +                        |
| Dectin-1                                   | Zymosan-D                            | -/+                   | -/+                      |
| TLR2:1                                     | Pam3CSK4                             | -/+                   | -/+                      |
| TLR2:1/6                                   | LTA                                  | -/+                   | -/+                      |
| TLR3                                       | poly(I:C) [0.02] <sup>‡</sup>        | +                     | +                        |
| TLR3                                       | poly(I:C)                            | ++++                  | +++                      |
| TLR4                                       | LPS-EK                               | +++                   | +++                      |
| TLR7/8                                     | R848                                 | +                     | -/+                      |
| TLR9                                       | CpG                                  | -/+                   | -/+                      |
| RIG-I                                      | 3p-hpRNA <sup>¶</sup>                | -/+                   | +                        |
| MDA5/TLR3 <sup>§</sup>                     | poly(I:C) <sup>¶</sup>               | ++++                  | +++                      |
| cGAS/ALR <sup>‡</sup>                      | poly(dA:dT) <sup>¶</sup>             | -/+                   | +++                      |
| NOD2                                       | <i>N</i> -GMDP                       | -/+                   | -/+                      |
| Unstimulated                               | No ligand                            | -/+                   | -/+                      |

<sup>#</sup> C1-C6 indicate the identified ligand combinations that induce high production of IL-12p70 by moDCs.

<sup>⌘</sup> Graded concentrations of IL-12p70 and IFN $\beta$  in the media from stimulated moDCs: -/+ indicates non-detectable to 20 pg/mL cytokine; +, 21-100 pg/mL; ++, 101-350 pg/mL; +++, 351-800 pg/mL; +++++, 801-1500 pg/mL; and +++++, > 1500 pg/mL.

<sup>§</sup> Poly(I:C) was transfected by lipid-based transfection and may engage both MDA5 and TLR3.

<sup>¶</sup> Lipid-based transfection was used to transfer the ligand into the cytosol.

<sup>‡</sup> Poly(I:C) concentration: 0.02  $\mu$ g/mL. When not indicated, poly(I:C) was used in concentration 20  $\mu$ g/mL.

<sup>‡</sup> Several sensors can recognize dsDNA: cGAS, and ALRs (*e.g.* IFI16 and DAI).

**Supplementary Table 5. ELISA kits used for quantification of cytokines**

| Item                                   | Provider   | Catno.   |
|----------------------------------------|------------|----------|
| DuoSet <sup>®</sup> Human IL-12 p70    | Bio-Techne | DY1270   |
| DuoSet <sup>®</sup> Human IFN- $\beta$ | Bio-Techne | DY814-05 |
| DuoSet <sup>®</sup> Human IL-10        | Bio-Techne | DY217B   |

**Supplementary Table 6. Primary antibodies used for analysis of expression of cell surface molecules on monocytes and monocyte-derived DCs**

| Specificity   | Fluorophore  | Clone  | Isotype               | Final conc.<br>$\mu\text{g}/\text{mL}$ | Provider  | Catno. |
|---------------|--------------|--------|-----------------------|----------------------------------------|-----------|--------|
| <b>CD14</b>   | APC/Cy7      | HCD14  | Mouse IgG1, $\kappa$  | 20                                     | BioLegend | 325620 |
| <b>CD11c</b>  | Pacific Blue | 3.9    | Mouse IgG1, $\kappa$  | 20                                     | BioLegend | 301626 |
| <b>HLA-DR</b> | BV605        | L243   | Mouse IgG2a, $\kappa$ | 5                                      | BioLegend | 307640 |
| <b>CD80</b>   | PE/Cy7       | 2D10   | Mouse IgG1, $\kappa$  | 10                                     | BioLegend | 305217 |
| <b>CD86</b>   | APC          | IT2.2  | Mouse IgG2b, $\kappa$ | 10                                     | BioLegend | 305411 |
| <b>CCR7</b>   | PE/Cy7       | G043H7 | Mouse IgG2a, $\kappa$ | 10                                     | BioLegend | 353225 |

**Supplementary Table 7. Isotype- and fluorophore-matched, irrelevantly targeted antibodies used as negative controls**

| Fluorophore         | Isotype               | Clone    | Specificity          | Provider  | Catno. |
|---------------------|-----------------------|----------|----------------------|-----------|--------|
| <b>APC/Cy7</b>      | Mouse IgG1, $\kappa$  | MOPC-21  | Unknown              | BioLegend | 400128 |
| <b>Pacific Blue</b> | Mouse IgG1, $\kappa$  | MOPC-21  | Unknown              | BioLegend | 400151 |
| <b>BV605</b>        | Mouse IgG2a, $\kappa$ | MOPC-173 | Unknown              | BioLegend | 400270 |
| <b>PE/Cy7</b>       | Mouse IgG1, $\kappa$  | MOPC-21  | Unknown              | BioLegend | 400126 |
| <b>APC</b>          | Mouse IgG2b, $\kappa$ | MG2b-57  | Trinitrophenol + KLH | BioLegend | 401210 |
| <b>PE/Cy7</b>       | Mouse IgG2a, $\kappa$ | MOPC-173 | Unknown              | BioLegend | 400231 |

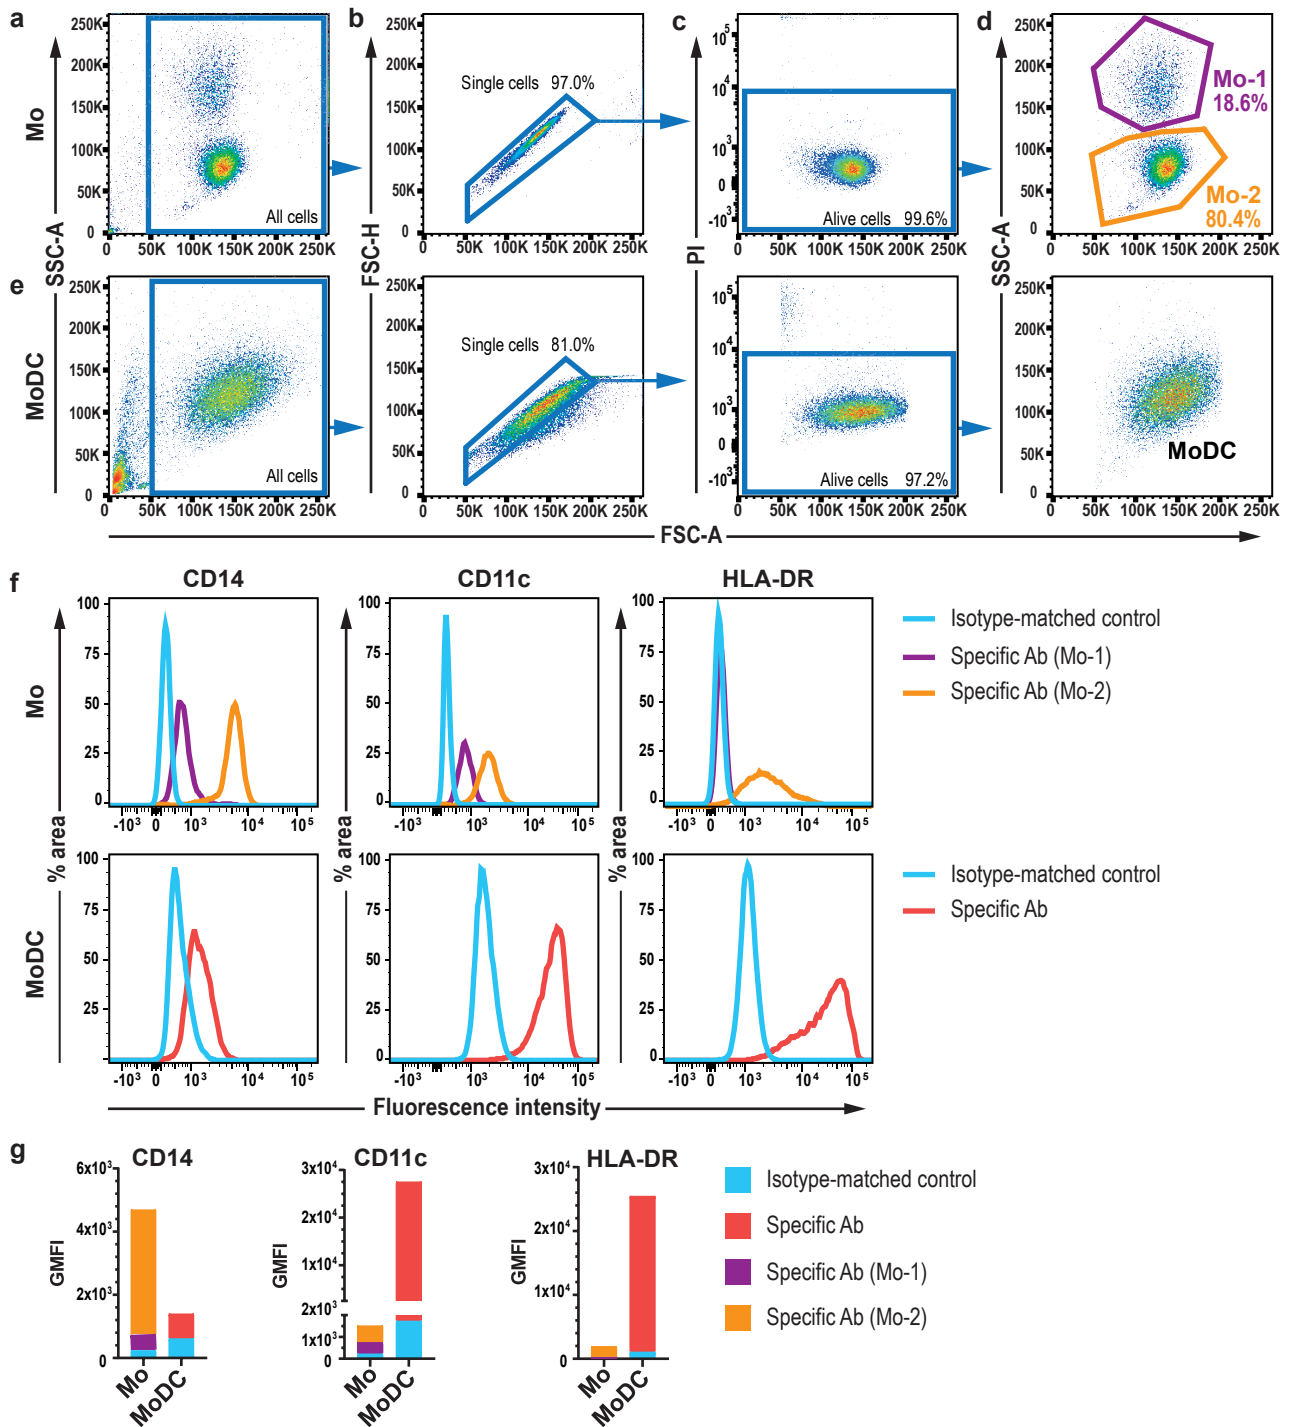

**Supplementary Figure 1. Gating and flow cytometry analysis of monocytes and monocyte-derived DCs.** Positively selected, freshly isolated CD14<sup>+</sup> monocytes and monocytes differentiated for 5 days by GM-CSF and IL-4 into monocyte-derived dendritic cells (moDC) were gated and analysed by flow cytometry as indicated: **a** The monocytes (Mo) were first gated based on size and complexity in a forward scatter (FSC-A) and side scatter (SSC-A) plot; **b** Next, a FSC-A and FSC-H plot was used to gate single cells and exclude doublets; **c** Dead cells were removed by their uptake of propidium iodide (PI); **d** Gated live, single cells distributed in two populations, Mo-1 and Mo-2, which constituted 18.6 and 80.4 % respectively, of the gated monocytes. **e** The same gating strategy was used for moDCs, and gated live, single moDCs distributed in one population in the FSC-A and SSC-A plot. **f** Mo-1 showed low CD14 and CD11c expression, and was negative for HLA-DR. Mo-2 on the other hand, was positive for CD14, CD11c, and HLA-DR. The moDCs showed reduced expression of CD14 compared to Mo-2, and increased expression of CD11c and HLA-DR compared to both Mo-1 and Mo-2. **g** The graphs show geometric mean fluorescence intensity (GMFI) for CD14, CD11c, and HLA-DR calculated from the experiment shown in f. The specific antibodies that were used: anti-CD14, clone HCD14; anti-CD11c, clone 3.9; and anti-HLA-DR, clone L243. The antibodies were used alongside isotype- and concentration-matched controls.

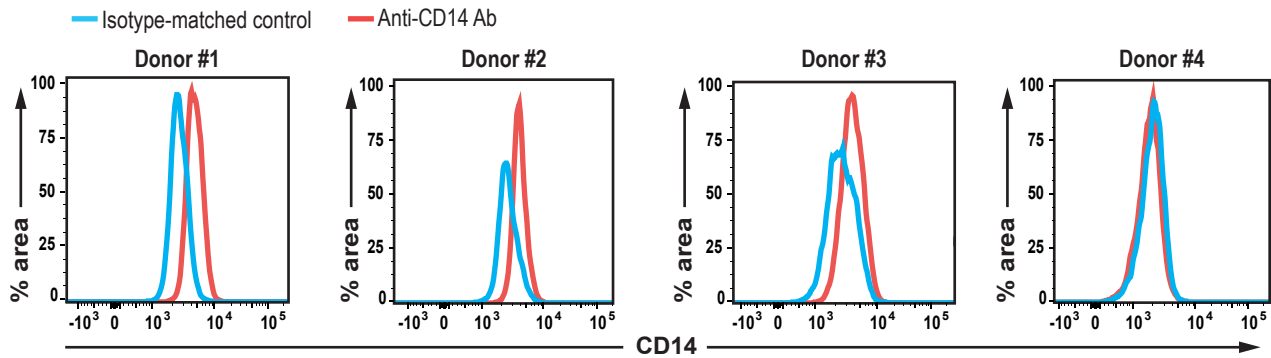

**Supplementary Figure 2. The blood donors gave rise to monocyte-derived DCs with low CD14 expression.** Monocyte-derived dendritic cells (moDCs) were differentiated with GM-CSF (100 ng/mL) and IL-4 (20 ng/mL) for 5 days before flow cytometry analysis of CD14. The moDCs were gated as indicated in Supplementary Figure 1 before evaluation of CD14 expression. The control antibody (blue line, clone MOPC-21) matched the isotype and concentration of the anti-CD14 antibody (red line, clone HCD14). MoDCs generated from different donors (Donor 1-4), showed low to no expression of CD14, suggesting that the monocytes were successfully differentiated into moDCs. The proportion of CD14<sup>+</sup> moDCs varied from 13.8-31.8 % with an average value of 22 % across the donors.

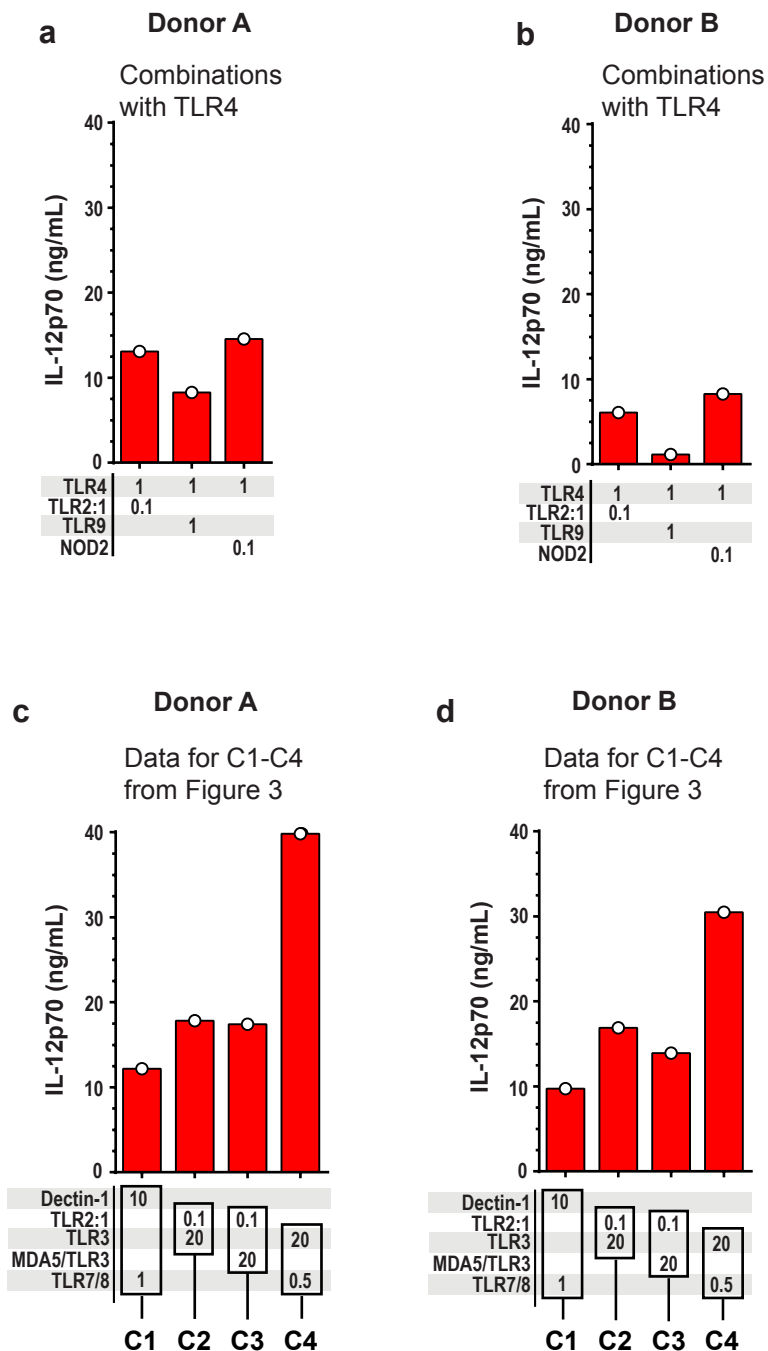

**Supplementary Figure 3. Levels of IL-12p70 induced by combinations containing the TLR4 ligand LPS-EK.** MoDC from two donors were stimulated for 24 h with different combinations of ligands: **a, b** LPS-EK (TLR4) in combination with an agonist of TLR2:1, TLR9 or NOD2; and **c, d** the combinations C1, C2, C3, and C4. IL-12p70 was quantified in the cell culture supernatants. The concentrations of the PRR ligands are indicated in  $\mu\text{g/mL}$  below the bars. Each bar present one experiment from one donor. The data presented in c and d for the combinations C1-C4 are part of Figure 3.
